# Supplementary material for: Quantification of Pseudomonas aeruginosa in multispecies biofilms using PMA-qPCR
Source: PeerJ. 2015 Feb 24;3:e787. doi: 10.7717/peerj.787 (PMC4349053; doi:10.7717/peerj.787)
Supplement: Supplemental Information 3 — Raw data for Fig. 4: Correlation Cq-value and % living cells. [file peerj-03-787-s003.xlsx]

## Sheet: with PMA
			Sample	% living cells	Cq value		average Cq value
			F	0	24.4388	23.2057	24.2949
					25.3748	25.2985
					22.797	24.6548
			A	0.1	23.33	20.7299	22.925
					23.4275	24.7696
					20.9387	24.3543
			B	1	23.2599	23.2482	23.1356
					23.2851	22.9821
					22.9245	23.1141
			C	10	19.0705	19.218	18.5605
					18.6031	17.583
					19.4414	17.447
			D	50	15.7426	13.9371	14.0067
					15.9676	12.6441
					12.318	13.4308
			E	75	11.92	13.3963	12.3819
					12.0213	11.316
					13.2705	12.3674
			G	100	10.0293	11.5624	10.9113
					10.856	10.9114
					11.1239	10.9847
		SPC	% living cells		stdev	sem
		0	0	24.2949	1.07273	0.43794
		720000	0.1	22.925	1.71032	0.698234
		7200000	1	23.1356	0.15429	0.0629888
		72000000	10	18.5605	0.856235	0.349556
		360000000	50	14.0067	1.54292	0.629896
		540000000	75	12.3819	0.812186	0.331574
		1200000000	100	10.9113	0.501106	0.204576
% living cells	log cell numbers	cell numbers	Cq
100	9.07918	1200000000	10.9113
75	8.73239	540000000	12.3819
50	8.5563	360000000	14.0067
10	7.85733	72000000	18.5605
1	6.85733	7200000	23.1356
0.1	5.85733	720000	22.925
0	0	0	24.2949
	10.9279
	12.3819
	14.0067
	18.5605
	23.1356
	22.925
	24.2949

## Sheet: without PMA
	sample	% living cells	Cq value		average Cq value
	F	0	20.8281	21.1646	21.1075
			20.2508	21.3756
			20.8147	22.2114
	A	0.1		20.3666	20.3409
				20.574
			20.5198	19.9033
	B	1	16.7347	20.6614	18.9778
			16.658	19.6888
			20.3818	19.742
	C	10	15.6054	17.1637	15.833
			15.4465	14.6413
			17.5681	14.5732
	D	50	13.3876	11.6712	11.4734
			13.2349	7.12828
			11.8635	11.5549
	E	75	11.8845	12.1458	9.102
			7.13068	5.94238
			5.90382	11.6048
	G	100	6.59561	5.96893	7.33915
			6.64368	10.7206
			7.2576	6.84845
	% living cells	Cq value	stdev	sem
	0	21.1075	0.662041	0.270277
	0.1	20.3409	0.304679	0.124385
	1	18.9778	1.806	0.737294
	10	15.833	1.26413	0.516077
	50	11.4734	2.27353	0.928167
	75	9.102	3.07795	1.25657
	100	7.33915	1.70856	0.697517
	log cell numbers	Cq value
	9.07918	7.33915
	8.73239	9.102
	8.5563	11.4734
	7.85733	15.833
	6.85733	18.9778
	5.85733	20.3409
	0	21.1075
with PMA	without PMA	% living cells	DCq
10.9113	7.33915	100	3.57212
12.3819	9.102	75	3.27993
14.0067	11.4734	50	2.53333
18.5605	15.833	10	2.72745
23.1356	18.9778	1	4.15787
22.925	20.3409	0.1	2.58408
24.2949	21.1075	0	3.1874

## Sheet: graphic
	with PMA	without PMA
0	24.2949	21.1075
0.1	22.925	20.3409
1	23.1356	18.9778
10	18.5605	15.833
50	14.0067	11.4734
75	12.3819	9.102
100	10.91	7.33915
		p-value (Mann-whitney SPSS)
	0	0.002
	0.1	0.01
	1	0.002
	10	0.024
	50	0.026
	75	0.015
	100	0.002
