# Supplementary material for: Quantification of Pseudomonas aeruginosa in multispecies biofilms using PMA-qPCR
Source: PeerJ. 2015 Feb 24;3:e787. doi: 10.7717/peerj.787 (PMC4349053; doi:10.7717/peerj.787)
Supplement: Supplemental Information 4 — Raw data for Fig. 5: Correlation log viable cells/ml and Cq-value. [file peerj-03-787-s004.xlsx]

## Sheet: corr log viable cells and Cq
	average Cq	log cell numbers (SPC)	cell numbers/ml		stdev log cell numbers		stdev Cq value
A	14.8344	8.95424	900000000		0.08358		0.537319
B	17.159	8.36173	230000000		0.16783		1.50663
C	22.8601	7.63682	4.33333e+07		0.153091		2.32325
D	23.1076	7.24715	1.76667e+07		0.399674		1.69133
E
F	26.3122	6.48902	3.08333e+06		0.197235		2.05299
G	28.6648	5.69897	500000		0.300888		1.47218
H	28.5151	5.52934	338333		0.167406		0.640278
I	31.079	4.97772	95000		0.0228576		0.405932
J	16.6723	8.38242	2.41222e+08		0.0194477		0.531449
K	21.8975	7.38242	2.41222e+07		0.0081387		0.420131
L	25.7112	6.50045	3.16556e+06		0.00591704		1.51188
M	28.359	5.50045	316556		0.0228457		0.681789
