# Supplementary material for: Quantification of Pseudomonas aeruginosa in multispecies biofilms using PMA-qPCR
Source: PeerJ. 2015 Feb 24;3:e787. doi: 10.7717/peerj.787 (PMC4349053; doi:10.7717/peerj.787)
Supplement: Supplemental Information 6 — Raw data for Fig. 8: Treatment of a monospecies biofilm with tobramycin. [file peerj-03-787-s006.xlsx]

## Sheet: overview after tobramycin
				average plate counting	stdev average	average log	stdev log
MONO CTRL
		P. aeruginosa		6.79722e+07	2.71394e+07	7.83233	0.173402
MONO TOBRA
		P. aeruginosa		305000	183146	5.4843	0.260785
				log cells/biofilm	stdev
	monospecies biofilm		ctrl	7.83233	0.17
			tobramycin	5.4843	0.26

## Sheet: mono
TOBRAMYCINE
Pseudomonas aeruginosa
8		0		8		0		8		0
7		0		7		0		7		0
6		0		6	1	1000000		6		0
5	1	100000		5	7	700000		5	4	400000
4	21	210000		4	160	1600000		4	84	840000
3		0		3		0		3		0
2		0		2		0		2		0
1		0		1		0		1		0
	average	155000			average	1100000			average	620000
	stdev	77781.7			stdev	636396			stdev	311127
8		0		8		0		8		0
7		0		7		0		7		0
6		0		6		0		6		0
5	2	200000		5	9	900000		5	7	700000
4	24	240000		4	82	820000		4	71	710000
3		0		3		0		3		0
2		0		2		0		2		0
1		0		1		0		1		0
	average	220000			average	860000			average	705000
	stdev	28284.3			stdev	56568.5			stdev	7071.07
			log
average per well:		77500	4.8893
		550000	5.74036
		310000	5.49136
		110000	5.04139
		430000	5.63347
		352500	5.54716
	average	305000		log average	5.4843
	stdev	183146		stdev log	0.260785
CTRL
Pseudomonas aeruginosa
8	2	200000000		8	1	100000000		8	1	100000000
7	15	150000000		7	11	110000000		7	2	20000000
6	114	114000000		6	203	203000000		6	34	34000000
5		0		5		0		5		0
4		0		4		0		4		0
3		0		3		0		3		0
2		0		2		0		2		0
1		0		1		0		1		0
	average	1.54667e+08			average	1.37667e+08			average	5.13333e+07
	stdev	0			stdev	0			stdev	0
8	1	100000000		8	2	200000000		8	2	200000000
7	10	100000000		7	23	230000000		7	19	190000000
6	89	89000000		6	168	168000000		6	139	139000000
5		0		5		0		5		0
4		0		4		0		4		0
3		0		3		0		3		0
2		0		2		0		2		0
1		0		1		0		1		0
	average	9.63333e+07			average	1.99333e+08			average	1.76333e+08
	stdev	0			stdev	0			stdev	0
average per well:		7.73333e+07
		6.88333e+07
		2.56667e+07
		4.81667e+07
		9.96667e+07
		8.81667e+07
	average	6.79722e+07		log average	7.83233
	stdev	2.71394e+07		stdev log	0.173402
